**S1 Fig. Illustrative scoring guide for facial hair greying scores (1-4), illustrated with *P. t. schweinfurthii* (1a-4a) and *P. t. verus* (1b-4b).**

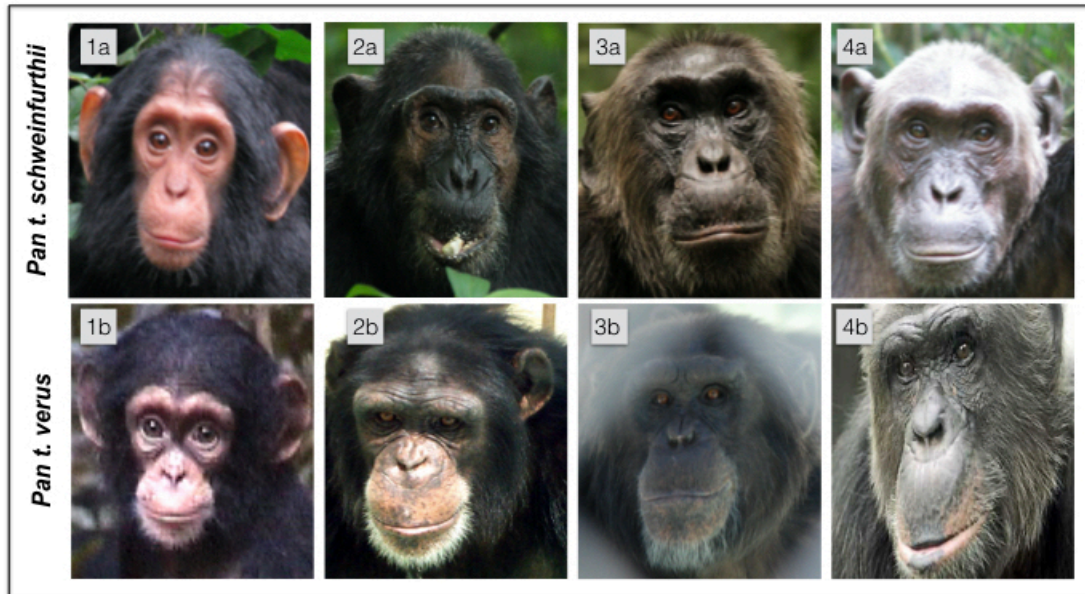

Source: https://storage.googleapis.com/plos-corpus-prod/10.1371/journal.pone.0235610/1/pone.0235610.s003.pdf?X-Goog-Algorithm=GOOG4-RSA-SHA256&X-Goog-Credential=wombat-sa%40plos-prod.iam.gserviceaccount.com%2F20231128%2Fauto%2Fstorage%2Fgoog4_request&X-Goog-Date=20231128T162109Z&X-Goog-Expires=86400&X-Goog-SignedHeaders=host&X-Goog-Signature=771636614820fbba5d14cd49ed228bf9b5526db28c1053a24a5e0d3270839f2957456c079c15a4f18127b22a84254fe4c50db77934c44bc5842188b67519b8846b89e808cc1552ddcfb43e729834c56bda2d51494b2fdb84bcc009547b6d9d27553f45c3699b5ee33f82714f402165d4e44ef5bbbe1f0f2e3e401efd8cd16286c9ba94423f883ca48b51b09d4390c4fd67d04719e984ec5008c5c58795917561c8351db5d807cdbcbab79c89087ed38e3e91d2004548c6a4bd067b8ccaf73c2a47fc018548da6a9eb45ad78decfdfa1d80e9ed9fca0015920a6f06be5be7992c2149a16facd3ed46c50b1fe4d5cfb84f80cfec3f59d90ecffee451130fb4640e
